# Supplementary material for: The Effects of TGF-β Signaling on Cancer Cells and Cancer Stem Cells in the Bone Microenvironment
Source: MDPI journal article supplement (doi:10.3390/ijms20205117), 2019-10-15
Supplement: s1 [file s1]

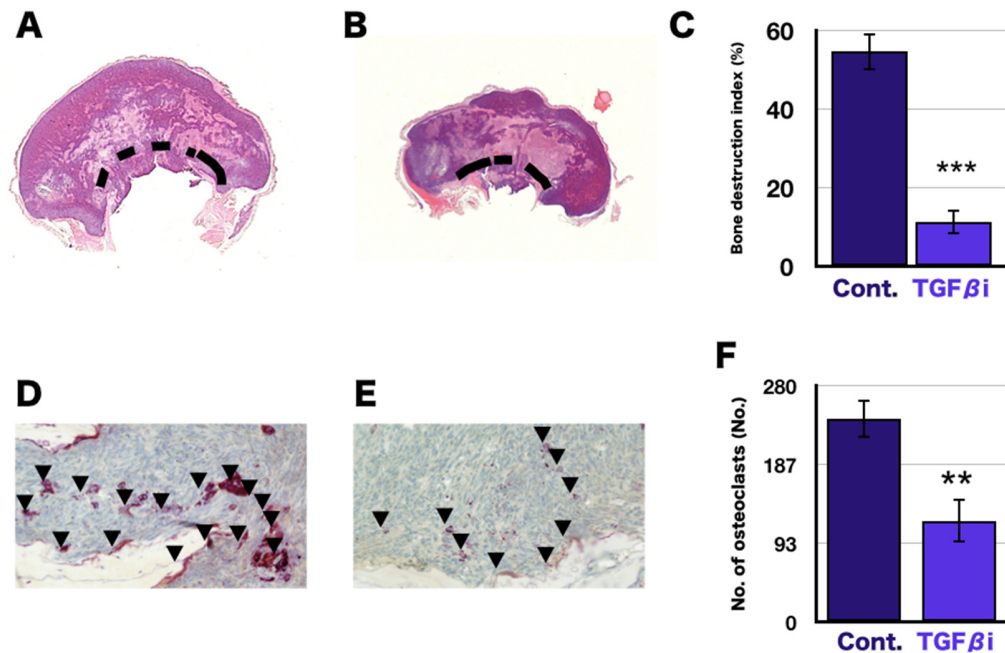

**Supplementary Figure S1:** The effects of TGF- $\beta$  signaling on osteoclast induction and osteolysis. (A) Length of osteolysis in the cranial bone of the control group. (B) Less osteolysis in the of R1- Ki treatment group. (C) Quantitative analysis of the degree of osteolysis. (D) A large number of osteoclasts was detected by Tartrate-Resistant Acid Phosphatase (TRAP) staining in the control group. Black triangle indicate osteoclast. (E) Fewer osteoclasts were detected in the R1- Ki treatment group. Black triangle indicate osteoclast. (F) Quantitative analysis of the induction of osteoclasts. \*\*, \*\*\*:  $p < 0.01$ ,  $p < 0.001$  versus Con and Control groups.

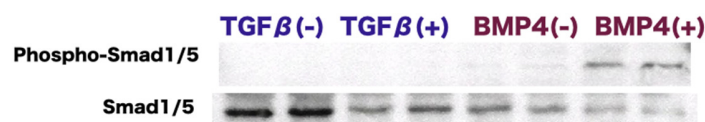

**Supplementary Figure S2:** Confirmation of the expression of *p*-SMAD1/5 and SMAD1/5. Expression of *p*-SMAD1/5 and SMAD1/5 was confirmed by the extracts from BMP-4 treated HeLa cells and untreated HeLa cells, respectively.
